# Supplementary material
Source: PubMed Central journal article supplement (PMC1896291)
Supplement: bj4040383add.pdf [file bj4040383add.pdf]

| Scaffold    | Annotation / Location     |       | Exons                                  |                                                                                                                                                                                                                                                                                                                                                            |
|-------------|---------------------------|-------|----------------------------------------|------------------------------------------------------------------------------------------------------------------------------------------------------------------------------------------------------------------------------------------------------------------------------------------------------------------------------------------------------------|
| <b>1316</b> | <b>ENSXETT00000035890</b> |       | 1-9, 11-22, 28-30, 32-33, 35-39, 43-47 | <a href="http://www.ensembl.org/Xenopus_tropicalis/transview?db=core;transcript=ENSXETT00000035890">http://www.ensembl.org/Xenopus_tropicalis/transview?db=core;transcript=ENSXETT00000035890</a>                                                                                                                                                          |
| <b>1316</b> | 95958                     | 95999 | 10                                     | <a href="http://www.ensembl.org/Xenopus_tropicalis/contigview?region=scaffold_1316">http://www.ensembl.org/Xenopus_tropicalis/contigview?region=scaffold_1316</a>                                                                                                                                                                                          |
|             |                           |       | 23-25                                  | TTCATTCTCAGCGTTCCGGCTGGACTACAGGATCTCCTACATGCTCTCCATTACAAAGAGGAATTCGGAGATCAGGGTAACAGCATTGAGAACTCAACCGTCTCTCCTCCTGAACTGCTGCCCCCATCTCTGGGGCTCCTGATATTGACGAGATTGCTGCCAGGGCGAAACCATGTTTCCCGGGAGTAAGGAGAAGAACCCGGTCTGCTGGATGACGAAGGGGGTCCGACCTCTGCGCGTTCTCATTACCTGATCATGCACGACTATCCCCCGCTGCTCTGCGCGCCCTCCAGCTGCTGTTTAAACACTTCAGCCAAAGAGCTGAGGTCCTCAGGCTTTCAAACAG |
| <b>4906</b> | 7514                      | 7690  | 26                                     | <a href="http://www.ensembl.org/Xenopus_tropicalis/contigview?region=scaffold_4906">http://www.ensembl.org/Xenopus_tropicalis/contigview?region=scaffold_4906</a>                                                                                                                                                                                          |
| <b>1316</b> | 47365                     | 47454 | 27                                     | <a href="http://www.ensembl.org/Xenopus_tropicalis/contigview?region=scaffold_1316">http://www.ensembl.org/Xenopus_tropicalis/contigview?region=scaffold_1316</a>                                                                                                                                                                                          |
| <b>4906</b> | 251                       | 502   | 31                                     | <a href="http://www.ensembl.org/Xenopus_tropicalis/contigview?region=scaffold_4906">http://www.ensembl.org/Xenopus_tropicalis/contigview?region=scaffold_4906</a>                                                                                                                                                                                          |
| <b>1316</b> | 37681                     | 37801 | 34                                     | <a href="http://www.ensembl.org/Xenopus_tropicalis/contigview?region=scaffold_1316">http://www.ensembl.org/Xenopus_tropicalis/contigview?region=scaffold_1316</a>                                                                                                                                                                                          |
| <b>1316</b> | 22831                     | 23011 | 40                                     | <a href="http://www.ensembl.org/Xenopus_tropicalis/contigview?region=scaffold_1316">http://www.ensembl.org/Xenopus_tropicalis/contigview?region=scaffold_1316</a>                                                                                                                                                                                          |
| <b>1316</b> | 24880                     | 25139 | 41                                     | <a href="http://www.ensembl.org/Xenopus_tropicalis/contigview?region=scaffold_1316">http://www.ensembl.org/Xenopus_tropicalis/contigview?region=scaffold_1316</a>                                                                                                                                                                                          |
| <b>1316</b> | 19676                     | 19876 | 42                                     | <a href="http://www.ensembl.org/Xenopus_tropicalis/contigview?region=scaffold_1316">http://www.ensembl.org/Xenopus_tropicalis/contigview?region=scaffold_1316</a>                                                                                                                                                                                          |
| <b>1316</b> | 1314                      | 1460  | 48                                     | <a href="http://www.ensembl.org/Xenopus_tropicalis/contigview?region=scaffold_1316">http://www.ensembl.org/Xenopus_tropicalis/contigview?region=scaffold_1316</a>                                                                                                                                                                                          |
|             |                           |       | 49                                     | GAACCTCTCGCCATTATTTTCCGTCCTTTTGTGGATTGCGGTGGCAGTCTGTACGGCCATGTTGTTTCTGCTGCCAAAGCCATTCGGTATCAGGCCCTTCTTGGTGTGCGGTGATGCTCAGGTCATATACACCATTGGATTGGGCCCAACACTCATACTGCTTGGAGCTGGCAAT                                                                                                                                                                            |
| <b>6284</b> | <b>GENSCAN00000009693</b> |       | 50                                     | <a href="http://www.ensembl.org/Xenopus_tropicalis/transview?transcript=GENSCAN00000009693;db=core">http://www.ensembl.org/Xenopus_tropicalis/transview?transcript=GENSCAN00000009693;db=core</a>                                                                                                                                                          |
|             |                           |       | 51,52                                  | CTGTTTGATTGGTGTATCGAGAGGAAACCTTACTGAACGTTATAAAGAGTGTGACAAGGAATGGTCGCTCCATCATTC TGACCGCCGTTCTGGCCCTCATCCTCGTCTACCTCTTCTCCATTATCGGGTTTCTCTTCTGAAAGACGACTTCATCAT GGAGGTGGACAGGCTGAAGAACCGGACCCCGGATCTGGGACACGGGGAGATCAGAACGTCACCTCTGACCAATGATG GACACTTGTTCATACGAAAACCTGTTCCATGACTGTATCTATCCAG                                                                 |
| <b>6354</b> | <b>ENSXETT00000035894</b> |       | 53,54                                  | <a href="http://www.ensembl.org/Xenopus_tropicalis/transview?db=core;transcript=ENSXETT00000035894">http://www.ensembl.org/Xenopus_tropicalis/transview?db=core;transcript=ENSXETT00000035894</a>                                                                                                                                                          |
|             |                           |       | 55                                     | GGCTCGAAAGAGACAAGTTTGATAATAAAACCGTTTCTTTGAGGAGCACATCATGTCTGAGCACTGTATGTGGCACTA CTTGTACTTCATCGTCTCGTAAAGTCAAGGACCCCACTGAGTACACGGGGCCCGAGAGCTACGTGGCCCAAATGATT GTG                                                                                                                                                                                           |
| <b>6354</b> | 2927                      | 3088  | 56                                     | <a href="http://www.ensembl.org/Xenopus_tropicalis/contigview?region=scaffold_6354">http://www.ensembl.org/Xenopus_tropicalis/contigview?region=scaffold_6354</a>                                                                                                                                                                                          |
| <b>3629</b> | 163                       | 246   | 57                                     | <a href="http://www.ensembl.org/Xenopus_tropicalis/contigview?region=scaffold_3629">http://www.ensembl.org/Xenopus_tropicalis/contigview?region=scaffold_3629</a>                                                                                                                                                                                          |

**Supplementary Table 1.** Table defines the genomic organization of *Itp2* showing the scaffold locale of correctly annotated transcripts and exons (if not predicted correctly). Sequence missing from the current genomic release (JGI 4.1, Ensembl 41) is provided. Due to misannotations, exon numbering relates to verified sequence data (Figs 1&2) rather than the Ensembl transcript annotation.

| Scaffold  | Annotation / location |         | Exons                             |                                                                                                                                                                                                                                                                                                                                                                   |
|-----------|-----------------------|---------|-----------------------------------|-------------------------------------------------------------------------------------------------------------------------------------------------------------------------------------------------------------------------------------------------------------------------------------------------------------------------------------------------------------------|
| 194       | FGENESH00000114960    |         | 1-6, 8-9, 11                      | <a href="http://www.ensembl.org/Xenopus_tropicalis/transview?transcript=FGENESH00000114960;db=core">http://www.ensembl.org/Xenopus_tropicalis/transview?transcript=FGENESH00000114960;db=core</a>                                                                                                                                                                 |
| 194       | 1810483               | 1810539 | 10                                | <a href="http://www.ensembl.org/Xenopus_tropicalis/cytoview?region=scaffold_194">http://www.ensembl.org/Xenopus_tropicalis/cytoview?region=scaffold_194</a>                                                                                                                                                                                                       |
| 194       | ENSXETT00000033593    |         | 3-9, 12-14, 18-21                 | <a href="http://www.ensembl.org/Xenopus_tropicalis/transview?transcript=ENSXETT00000033593;db=core">http://www.ensembl.org/Xenopus_tropicalis/transview?transcript=ENSXETT00000033593;db=core</a>                                                                                                                                                                 |
|           |                       |         | 15-16                             | ATATTTGGTATCCTGAAGGCACCATTTAAGGAGAAAAGGTACAGACGGTCCTTTGCTAAGACTGGAGGAGCTTTCTGACC<br>AAAAAATTCCTCCCTACCAATATATGTTTCGGCTCTGTTATCGGGTACTTCGCCACTCACAAAGAGGACTATAGAAAAA<br>CCAGGAACATATAGCCAAACAATTTGGAGTCATGCAATCGCAAATTGGTTATGACATTCTTGACAGAGGATACCATTACA<br>GCTCTACTACATAACAACCGAAAACCTATTGGAAAAGCATATTACCAAAACAGAGGTGGAAACCTTTGTAAACTTGGTCA<br>GAAAAACCGTGAGCCCCG |
| 194       | 1857082               | 1857201 | 17                                | <a href="http://www.ensembl.org/Xenopus_tropicalis/cytoview?region=scaffold_194">http://www.ensembl.org/Xenopus_tropicalis/cytoview?region=scaffold_194</a>                                                                                                                                                                                                       |
| 5020      | 3848                  | 4047    | 22                                | <a href="http://www.ensembl.org/Xenopus_tropicalis/cytoview?region=scaffold_5020">http://www.ensembl.org/Xenopus_tropicalis/cytoview?region=scaffold_5020</a>                                                                                                                                                                                                     |
| 5020      | 6022                  | 6154    | 23                                | <a href="http://www.ensembl.org/Xenopus_tropicalis/cytoview?region=scaffold_5020">http://www.ensembl.org/Xenopus_tropicalis/cytoview?region=scaffold_5020</a>                                                                                                                                                                                                     |
| 490       | 8805                  | 8862    | 24                                | <a href="http://www.ensembl.org/Xenopus_tropicalis/transview?transcript=GENSCAN00000027399">http://www.ensembl.org/Xenopus_tropicalis/transview?transcript=GENSCAN00000027399</a>                                                                                                                                                                                 |
| 490       | GENSCAN00000027399    |         | 25-28, 31-35                      | <a href="http://www.ensembl.org/Xenopus_tropicalis/cytoview?region=scaffold_490">http://www.ensembl.org/Xenopus_tropicalis/cytoview?region=scaffold_490</a>                                                                                                                                                                                                       |
| 490       | 44335                 | 44457   | 29                                | <a href="http://www.ensembl.org/Xenopus_tropicalis/cytoview?region=scaffold_490">http://www.ensembl.org/Xenopus_tropicalis/cytoview?region=scaffold_490</a>                                                                                                                                                                                                       |
| 490       | 46188                 | 46388   | 30                                | <a href="http://www.ensembl.org/Xenopus_tropicalis/cytoview?region=scaffold_490">http://www.ensembl.org/Xenopus_tropicalis/cytoview?region=scaffold_490</a>                                                                                                                                                                                                       |
| 490 (238) | ENSXETT00000040536    |         | 31-37, 40-45, 47,<br>50-52, 54-58 | <a href="http://dec2005.archive.ensembl.org/Xenopus_tropicalis/transview?db=core&amp;transcript=ENSXETT00000040536&amp;show=peptide&amp;number=on&amp;submit=Refresh">http://dec2005.archive.ensembl.org/Xenopus_tropicalis/transview?db=core&amp;transcript=ENSXETT00000040536&amp;show=peptide&amp;number=on&amp;submit=Refresh</a>                             |
| 490       | 71639                 | 71729   | 38                                | <a href="http://www.ensembl.org/Xenopus_tropicalis/cytoview?region=scaffold_490">http://www.ensembl.org/Xenopus_tropicalis/cytoview?region=scaffold_490</a>                                                                                                                                                                                                       |
| 490       | 73802                 | 73971   | 39                                | <a href="http://www.ensembl.org/Xenopus_tropicalis/cytoview?region=scaffold_490">http://www.ensembl.org/Xenopus_tropicalis/cytoview?region=scaffold_490</a>                                                                                                                                                                                                       |
| 490       | 84632                 | 84715   | 46                                | <a href="http://www.ensembl.org/Xenopus_tropicalis/cytoview?region=scaffold_490">http://www.ensembl.org/Xenopus_tropicalis/cytoview?region=scaffold_490</a>                                                                                                                                                                                                       |
| 490       | 116931                | 117123  | 48                                | <a href="http://www.ensembl.org/Xenopus_tropicalis/cytoview?region=scaffold_490">http://www.ensembl.org/Xenopus_tropicalis/cytoview?region=scaffold_490</a>                                                                                                                                                                                                       |
| 490       | <151683               | 151754  | 49                                | <a href="http://www.ensembl.org/Xenopus_tropicalis/cytoview?region=scaffold_490">http://www.ensembl.org/Xenopus_tropicalis/cytoview?region=scaffold_490</a>                                                                                                                                                                                                       |
| 490       | 164778                | 164873  | 53                                | <a href="http://www.ensembl.org/Xenopus_tropicalis/cytoview?region=scaffold_490">http://www.ensembl.org/Xenopus_tropicalis/cytoview?region=scaffold_490</a>                                                                                                                                                                                                       |

**Supplementary Table 2.** Table defines the genomic organization of *Itr3* showing the scaffold locale of correctly annotated transcripts and exons (if not predicted correctly). Sequence missing from the current genomic release (JGI 4.1, Ensembl 41) is provided. Due to misannotations, exon numbering relates to verified sequence data (Figs 1&2) rather than the Ensembl transcript annotation.

|                       |                                    |
|-----------------------|------------------------------------|
| IP <sub>3</sub> R2[1] | 5'GGGCTGTTGAAGAGATTTGC             |
|                       | 5'GTCTGAATGAGAATGTCCGC             |
| IP <sub>3</sub> R2[2] | 5'AGAAGTTCCTGACATGCGACGAGT         |
|                       | 5'GCCAATTCTTGCATCACTGCC            |
| IP <sub>3</sub> R2[3] | 5'ATCATCTGTGCAACGAGATCAGC          |
|                       | 5'TTTCAGTGCCTCGTCTCCTT             |
| IP <sub>3</sub> R2[4] | 5'GAAGAACATGGACCCGAAGA             |
|                       | 5'GTTCTCTTGTTGCCACCCAT             |
| IP <sub>3</sub> R3[1] | 5'GCAAAGCACATAGAGAGCTA             |
|                       | 5'CAGCATGAAAGAGGCGAA               |
| IP <sub>3</sub> R3[2] | 5'CCACTTCATGCCAGCAACTATGAGCTCACTG  |
|                       | 5'GTAATGGCCCGTGAGGTGGAAGCATGTATC   |
| IP <sub>3</sub> R3[3] | 5'GATCATGACAGAGCTTACTAATGCTGGAGATG |
|                       | 5'CATGCGTTGACGTCTCTTCCTCTGCTCTGT   |
| IP <sub>3</sub> R3[4] | 5'AAAGAATAAGAACCTGGACTGG           |
|                       | 5'GGGAGAAGACAAGATCTTTATAG          |

**Supplementary Table 3.** Gene specific primers used for amplifying IP<sub>3</sub>R2 and IP<sub>3</sub>R3 in RT-PCR analyses.
